# Supplementary material
Source: Springer Nature journal article supplement (https://www.springermedizin.de/resource/supplementary/13005_2014_340_MOESM7_ESM.pdf/9625984)
Supplement: MOESM7 [file 9625984]

**Dedection rate of SOLs  
in the maxillary sinus on  
panoramic radiographs**

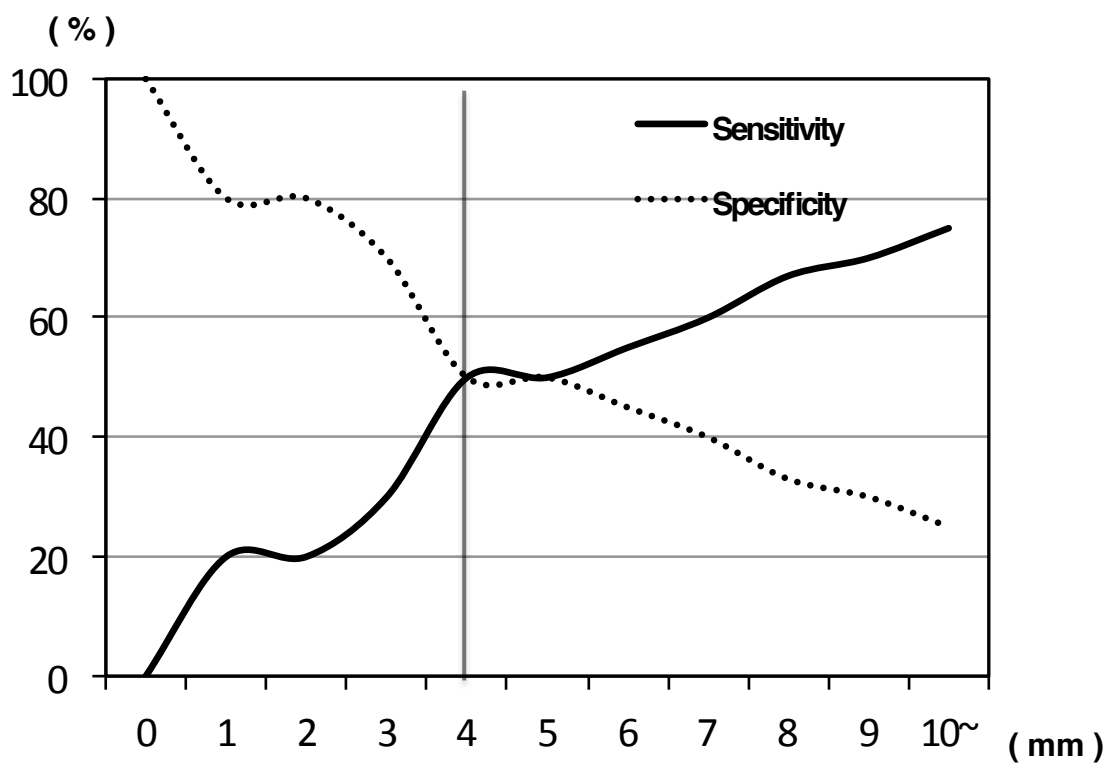

**Major axis length of SOLs in the maxillary sinus**

**SOLs: Space occupying lesions**
